# Supplementary material
Source: Springer Nature journal article supplement (https://www.springermedizin.de/resource/supplementary/13075_2009_2700_MOESM1_ESM.pdf/9692678)

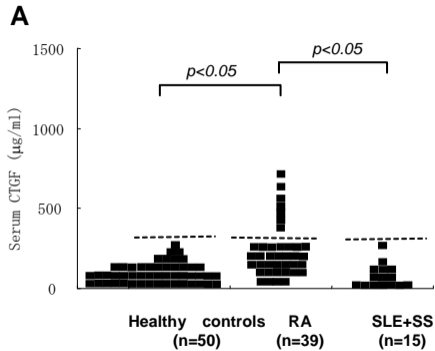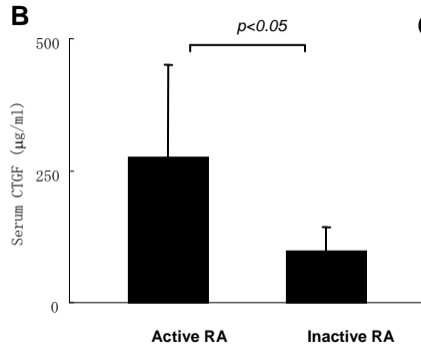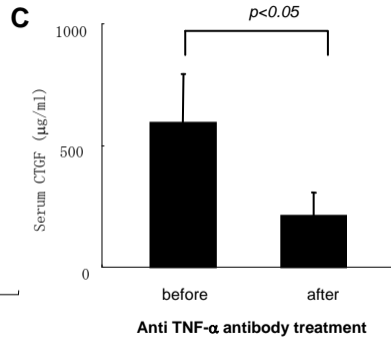

Supplement: MOESM1 [file 9692678]
